# Supplementary material for: Treatment outcomes in patients with opioid use disorder initiated by prescription: a systematic review protocol
Source: Springer Nature journal article supplement (doi:10.1186/s13643-018-0682-0), 2018-01-24
Supplement: MOESM1 [file 15412612]

## **Data Extraction Form**

Study ID: \_\_\_\_\_ Reviewer Initials: \_\_\_\_\_

### **Publication Details**

Author (last name, first initial): \_\_\_\_\_ Year: \_\_\_\_\_

Title: \_\_\_\_\_

Journal: \_\_\_\_\_ Country: \_\_\_\_\_

### **Methods**

Study design: \_\_\_\_\_ Study setting: \_\_\_\_\_

Length of study: \_\_\_\_\_

Description of sample:

Exposure: \_\_\_\_\_ Intervention (if applicable): \_\_\_\_\_

### **Demographics**

Number of participants: Total: \_\_\_\_\_ Men: \_\_\_\_\_ Women: \_\_\_\_\_ Other: \_\_\_\_\_ Per group: \_\_\_\_\_

Mean age (SD): Total: \_\_\_\_\_ Men: \_\_\_\_\_ Women: \_\_\_\_\_ Other: \_\_\_\_\_

Per group: \_\_\_\_\_

Ethnicity:

### **Exposure measurements (Initial exposure to opioids). Circle one.**

Self-report      Other \_\_\_\_\_

Comments:

### **Outcome measurements:**

Illicit opioid use: \_\_\_\_\_

Treatment retention: \_\_\_\_\_

Poly-substance use: \_\_\_\_\_

Comments:

### **Results**

Statistical methods: \_\_\_\_\_ Adjusted for: \_\_\_\_\_

Coefficient: \_\_\_\_\_ 95% CI: \_\_\_\_\_ p-value: \_\_\_\_\_

Findings: \_\_\_\_\_

Limitations: \_\_\_\_\_

**Inclusion Criteria**

Patients on opioid substitution therapy

Initial exposure to opioids (i.e. medical prescription or illicit) measured

RCT or observational study design

**Exclusion Criteria**

OST being used for purposes other than maintenance treatment (i.e. recreational or detoxification)

Study does not measure a primary (illicit opioid use) or secondary (treatment retention and poly-substance use) outcome variables

**Additional Comments:**

---

---

---

---

---

---

---

---

---

---
